# Supplementary material
Source: Springer Nature journal article supplement (https://www.springermedizin.de/resource/supplementary/12885_2005_440_MOESM5_ESM.pdf/9470166)

**Relative Mammaglobin A mRNA expression**

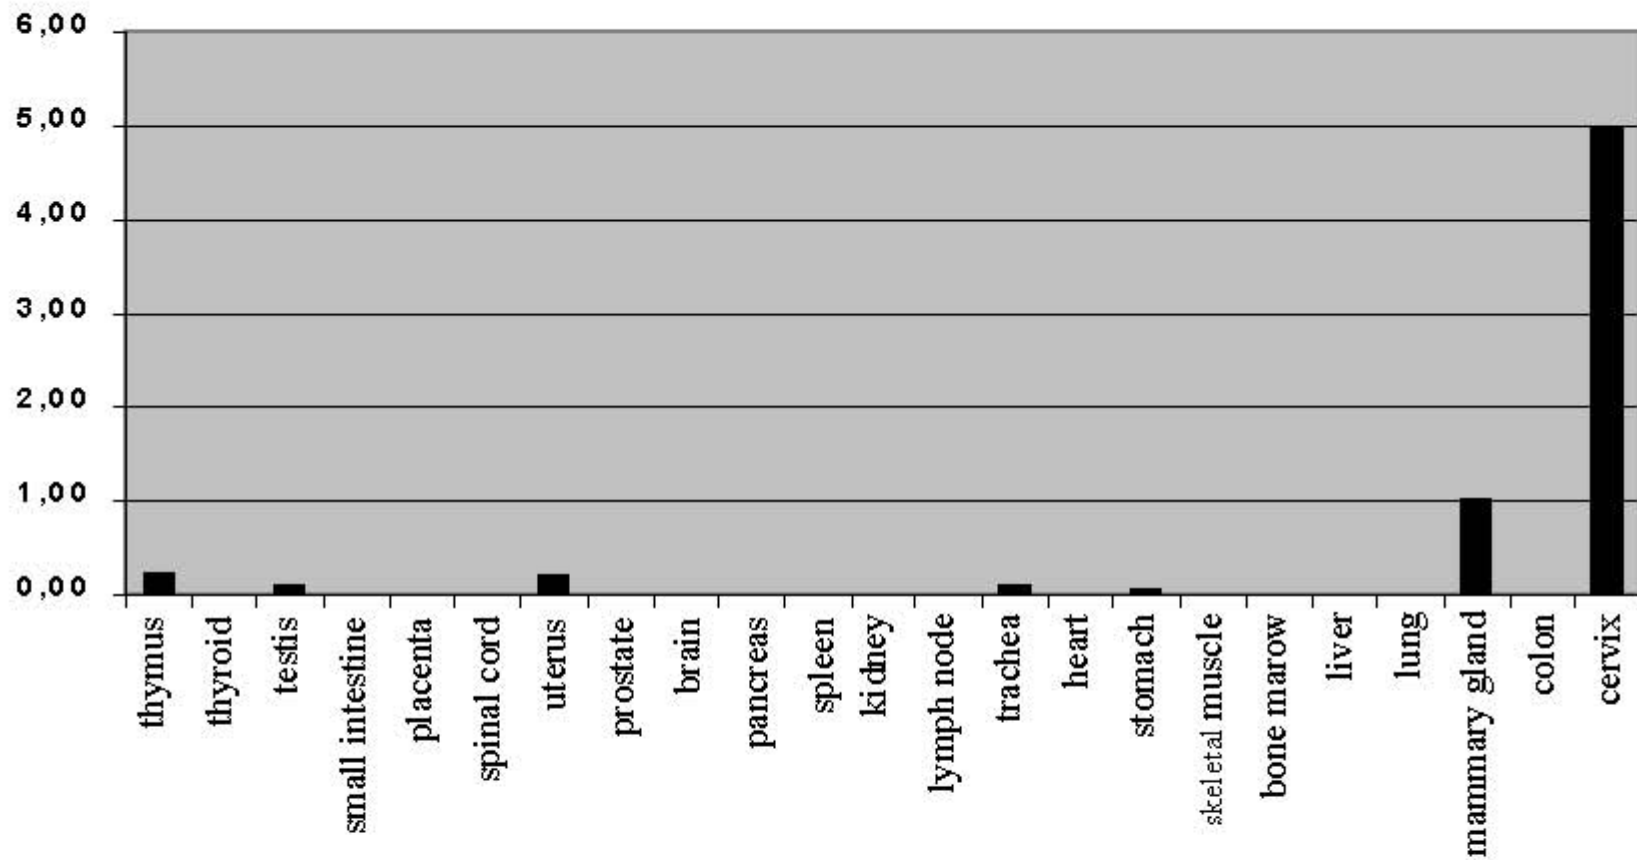

**Normal human tissues**

Supplement: MOESM5 [file 9470166]
